# Supplementary material for: In situ neutron diffraction study of the formation of Ho2Ge2O7 pyrochlore at high temperature and pressure
Source: Royal Society of Chemistry journal article supplement (doi:10.1039/c7dt03370b), 2017-01-01
Supplement: c7dt03370b1.pdf [file c7dt03370b1.pdf]

# *In situ* neutron diffraction study of the formation of $\text{Ho}_2\text{Ge}_2\text{O}_7$ pyrochlore at high temperature and pressure

## SUPPLEMENTARY INFORMATION

Helen Y. Playford,<sup>1\*</sup> Craig L. Bull,<sup>a</sup> Matthew G. Tucker,<sup>2</sup> Nicholas P. Funnell,<sup>a</sup>  
Christopher J. Ridley,<sup>a</sup> Kenneth P. Marshall<sup>3</sup> and Richard I. Walton<sup>c</sup>

### 1. Additional Figures

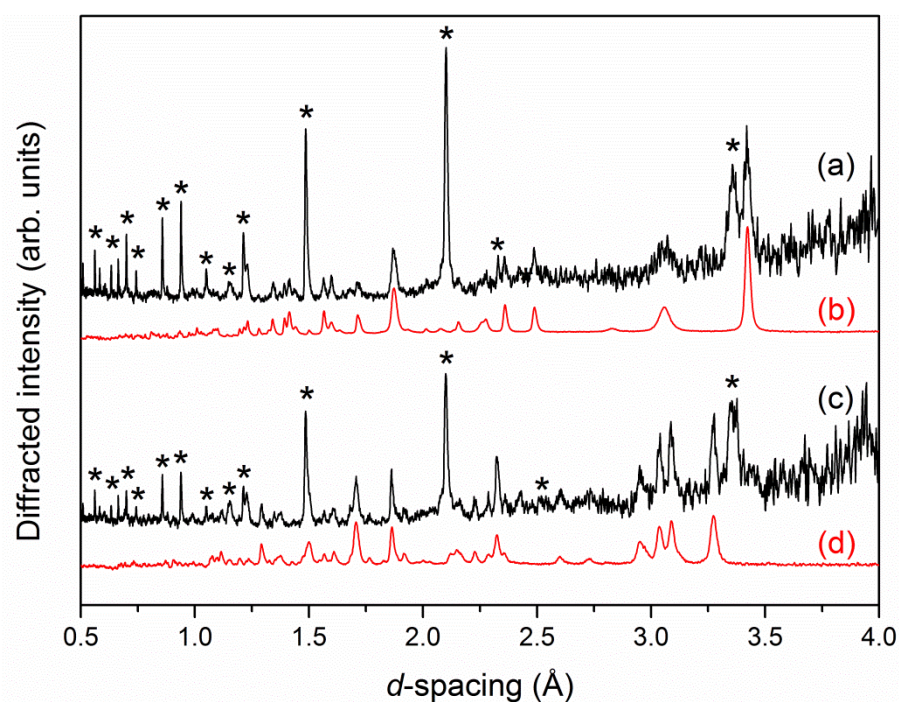

**Figure S 1.** A comparison of the diffraction patterns from the starting materials in vanadium cans (b) and (d) and in the high-temperature setup (a) and (c). The traces labelled (a) and (b) are from a 1:2 mixture of  $\text{Ho}_2\text{O}_3$  and  $\text{GeO}_2$  and (c) and (d) the  $\text{Ho}_2\text{Ge}_2\text{O}_7$  pyrogermanate. Although an increase in background scattering is evident in (a) and (c), and additional peaks arising from the MgO and graphite from the container can be seen (marked by asterisks), all of the sample peaks are clearly visible.

<sup>1</sup> STFC ISIS Facility, Rutherford Appleton Laboratory, Didcot, OX11 0QX, UK

<sup>2</sup> Spallation Neutron Source, Oak Ridge National Laboratory, Oak Ridge, Tennessee, USA

<sup>3</sup> Department of Chemistry, University of Warwick, Gibbet Hill Road, Coventry, CV4 7AL, UK

\* Corresponding author: [helen.playford@stfc.ac.uk](mailto:helen.playford@stfc.ac.uk)

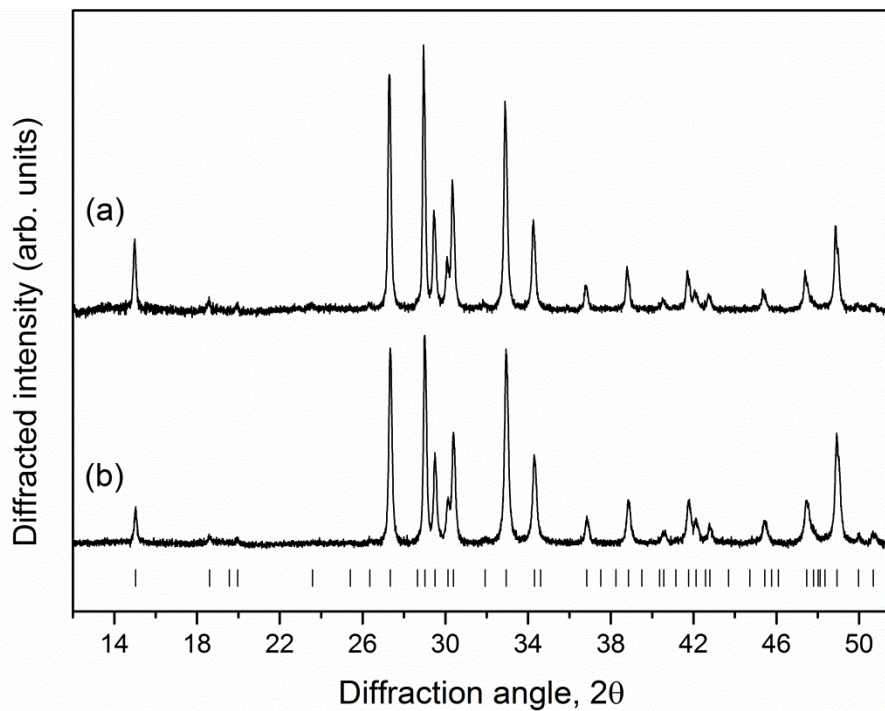

**Figure S 2.** X-ray powder diffraction patterns from hydrothermally-produced  $\text{Ho}_2\text{Ge}_2\text{O}_7$  pyrogermanate, (a) as made and (b) after heating at  $900\text{ }^\circ\text{C}$  for 2 hours. Tickmarks show the allowed reflections for the tetragonal pyrogermanate phase.

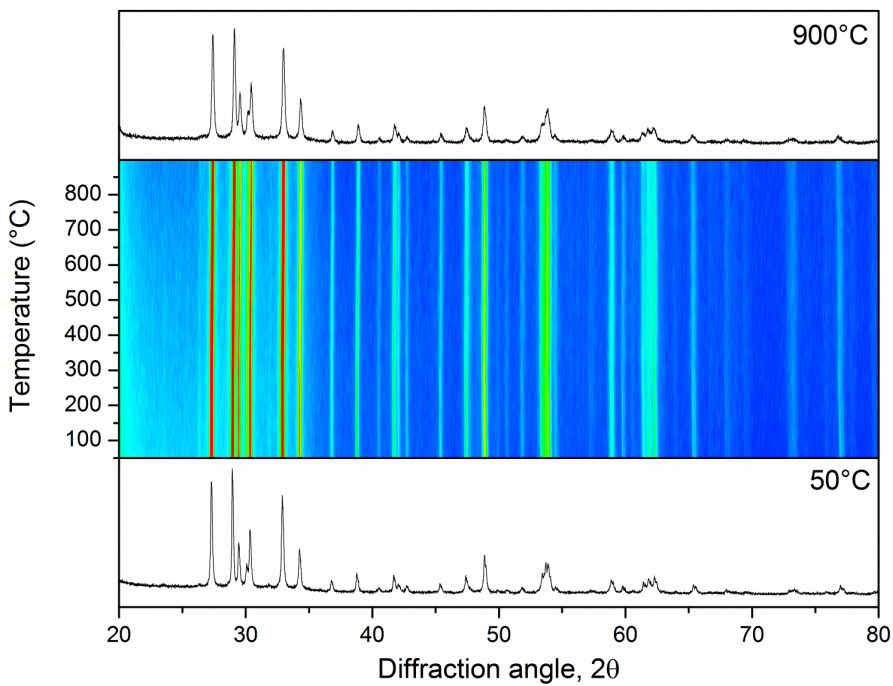

**Figure S 3.** Variable temperature X-ray diffraction from hydrothermally-produced  $\text{Ho}_2\text{Ge}_2\text{O}_7$  pyrogermanate. The top and bottom panels show individual diffraction patterns at  $50\text{ }^\circ\text{C}$  and  $900\text{ }^\circ\text{C}$  and the contour plot shows diffracted intensity as a function of angle and temperature. No changes are observed across this temperature range.

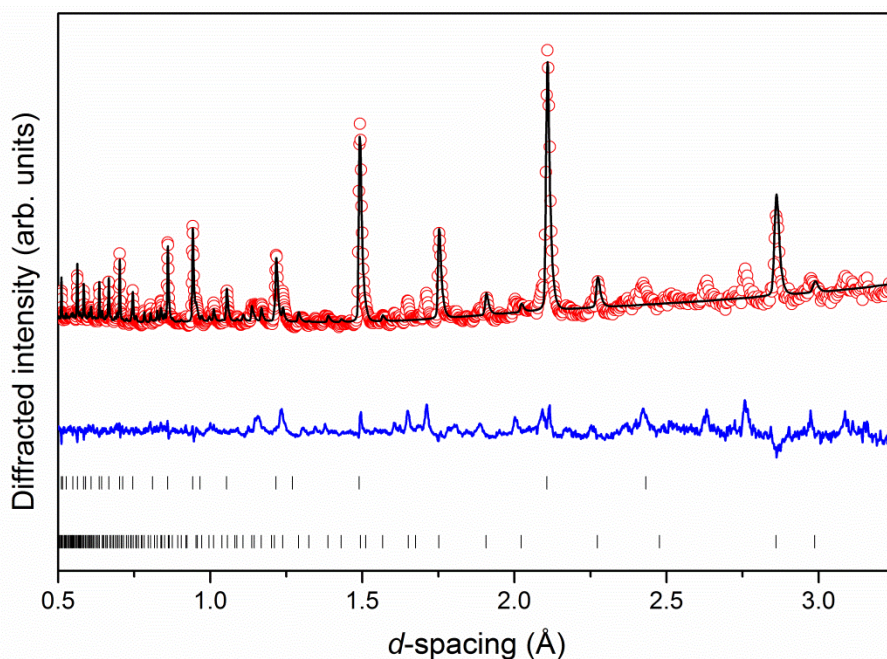

**Figure S 4.** Rietveld refinement against data from a second *in situ* sample of  $\text{Ho}_2\text{Ge}_2\text{O}_7$  pyrochlore, measured after downloading (i.e. at ambient pressure) but with the powder still inside the HPHT setup. The upper tickmarks represent the peak positions from the MgO cylinder, and the lower set are those for the cubic pyrochlore phase.

## 2. Details of Rietveld refinements

The Rietveld refinements of the recovered samples, that are discussed in section 3.3 of the manuscript, were carried out with the following parameters.

*In situ* sample:

- 20 variables.
- 3511 datapoints.
- $wRp = 3.72\%$ ,  $Rp = 2.48\%$ .
- 2 phases:  $\text{Ho}_2\text{Ge}_2\text{O}_7$  (19.3 wt%), MgO (80.6 wt%).
- Background function: shifted Chebyshev polynomial with 12 terms.
- Peak profile function: back-to-back exponentials convolved with pseudo-Voigt function (GSAS TOF profile 3). 3 refined terms for each phase (constrained to be equal for both phases).

Precursor sample:

- 20 variables.
- 3511 datapoints.
- $wRp = 5.69\%$ ,  $Rp = 4.76\%$ .
- 2 phases:  $\text{Ho}_2\text{Ge}_2\text{O}_7$  (49 wt%), MgO (51 wt%).
- Background function: shifted Chebyshev polynomial with 12 terms.

- Peak profile function: back-to-back exponentials convolved with pseudo-Voigt function (GSAS TOF profile 3). 3 refined terms for each phase (constrained to be equal for both phases).

### 3. Equation of state determination

#### 3.1 Pyrogermanate

An example refinement from the equation of state determination is shown in Figure S5 and the tabulated results in Table S1. The refinement used the following parameters:

- 27 variables.
- 3510 datapoints.
- $wRp = 5.52\%$ ,  $Rp = 6.78\%$ .
- 3 phases:  $\text{Ho}_2\text{Ge}_2\text{O}_7$  (59 wt%), NaCl (8 wt%), diamond (33 wt%)
- Background function: shifted Chebyshev polynomial with 17 terms.
- Peak profile function: back-to-back exponentials convolved with pseudo-Voigt function (GSAS TOF profile 3). 3 terms refined for diamond only (this signal arises from the sintered diamond anvils and is very strong).

**Table S 1.** Refined parameters from the determination of the equation of state for holmium pyrogermanate.

| Load (tonnes) | NaCl                 |                | $\text{Ho}_2\text{Ge}_2\text{O}_7$ (pyrogermanate) |                    |                      |
|---------------|----------------------|----------------|----------------------------------------------------|--------------------|----------------------|
|               | V ( $\text{\AA}^3$ ) | Pressure (GPa) | a ( $\text{\AA}$ )                                 | c ( $\text{\AA}$ ) | V ( $\text{\AA}^3$ ) |
| 0             | 179.72(5)            | -0.029(6)      | 6.8122(7)                                          | 12.398(2)          | 575.34(18)           |
| 20            | 167.54(5)            | 1.98(2)        | 6.7728(6)                                          | 12.328(2)          | 565.50(15)           |
| 30            | 160.26(4)            | 3.67(1)        | 6.7440(7)                                          | 12.281(2)          | 558.56(17)           |
| 40            | 156.18(4)            | 4.83(1)        | 6.7248(7)                                          | 12.249(2)          | 553.94(17)           |
| 50            | 151.09(4)            | 6.54(2)        | 6.6987(8)                                          | 12.205(2)          | 547.67(20)           |
| 60            | 147.02(5)            | 8.15(2)        | 6.6753(9)                                          | 12.167(3)          | 542.16(22)           |
| 70            | 144.13(4)            | 9.5(2)         | 6.662(1)                                           | 12.137(3)          | 538.67(24)           |

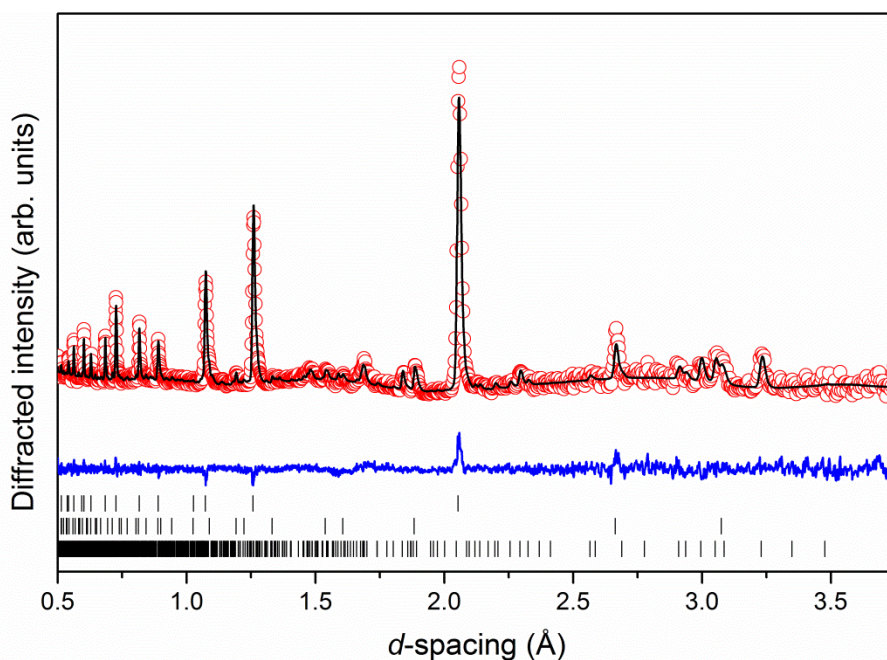

**Figure S 5.** Example of a Rietveld refinement used in the determination of the equation of state for holmium pyrogermanate. The data were collected under an applied load of 50 tonnes. The tick marks represent the three phases used in the refinement. Upper: diamond, middle: NaCl, lower: Ho<sub>2</sub>Ge<sub>2</sub>O<sub>7</sub> pyrogermanate.

### 3.2 Pyrochlore

An example refinement from the equation of state determination is shown in Figure S6 and the tabulated results in Table S2. The refinement used the following parameters:

- 22 variables.
- 3510 datapoints.
- wRp = 6.21%, Rp = 5.76%.
- 3 phases: Ho<sub>2</sub>Ge<sub>2</sub>O<sub>7</sub> (25 wt%), MgO(28 wt%), Al<sub>2</sub>O<sub>3</sub> (47 wt%)
- Background function: shifted Chebyshev polynomial with 12 terms.
- Peak profile function: back-to-back exponentials convolved with pseudo-Voigt function (GSAS TOF profile 3). 3 refined terms for each phase (constrained to be equal).

**Table S 2.** Refined parameters from the determination of the equation of state for the holmium germanate pyrochlore.

| Load (tonnes) | MgO                 |                | Ho <sub>2</sub> Ge <sub>2</sub> O <sub>7</sub> (pyrochlore) |                     |
|---------------|---------------------|----------------|-------------------------------------------------------------|---------------------|
|               | V (Å <sup>3</sup> ) | Pressure (GPa) | a (Å)                                                       | V (Å <sup>3</sup> ) |
| 6             | 74.62(1)            | 0.18(2)        | 9.8971(9)                                                   | 969.4(3)            |
| 10            | 74.608(5)           | 0.210(5)       | 9.8968(8)                                                   | 969.4(2)            |
| 15            | 74.539(5)           | 0.360(2)       | 9.8948(7)                                                   | 968.8(2)            |
| 20            | 74.496(5)           | 0.450(1)       | 9.8932(8)                                                   | 968.3(2)            |
| 30            | 74.09(1)            | 1.337(8)       | 9.880(1)                                                    | 964.4(3)            |
| 40            | 73.41(1)            | 2.897(5)       | 9.8580(9)                                                   | 958.0(3)            |
| 45            | 73.07(1)            | 3.707(3)       | 9.8462(9)                                                   | 954.6(3)            |

|    |           |          |           |          |
|----|-----------|----------|-----------|----------|
| 50 | 72.741(5) | 4.51(1)  | 9.8332(9) | 950.8(3) |
| 55 | 72.43(1)  | 5.273(3) | 9.8209(9) | 947.2(3) |
| 60 | 72.15(1)  | 5.986(6) | 9.811(1)  | 944.4(3) |

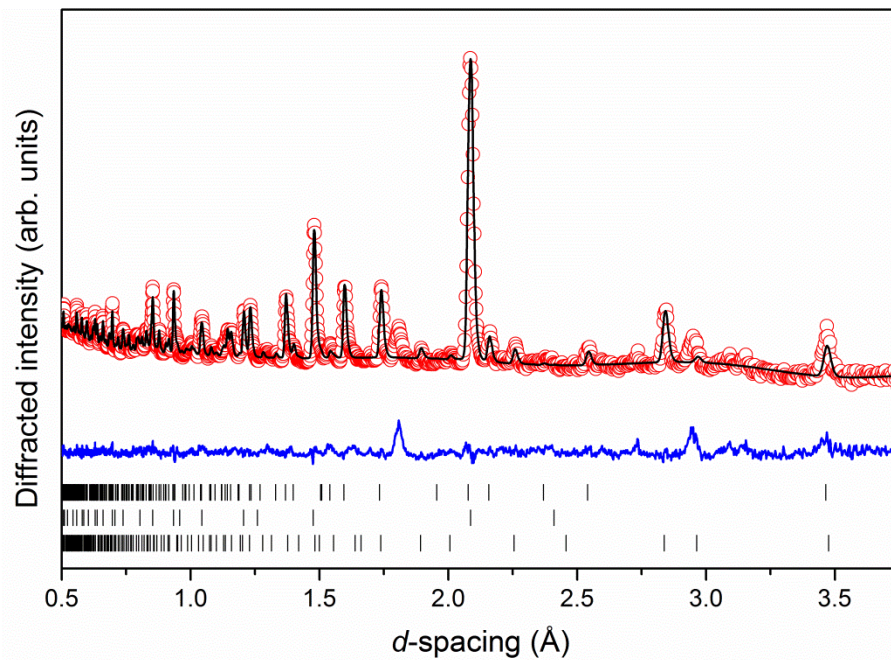

**Figure S 6.** Example of a Rietveld refinement used in the determination of the equation of state for the holmium germanate pyrochlore. The data were collected under an applied load of 50 tonnes. The tick marks represent the three phases used in the refinement. Upper: Al<sub>2</sub>O<sub>3</sub>, middle: MgO, lower: Ho<sub>2</sub>Ge<sub>2</sub>O<sub>7</sub> pyrochlore.
